# Supplementary material for: Dense ceramic catalytic membranes and membrane reactors for energy and environmental applications
Source: Royal Society of Chemistry journal article supplement (doi:10.1039/c1cc13001c), 2011-01-01
Supplement: c1cc13001c.pdf [file c1cc13001c.pdf]

## Supporting information

### **Dense Ceramic Catalytic Membranes and Membrane Reactors for Energy and Environmental Applications**

Xueliang Dong,<sup>a</sup> Wanqin Jin,<sup>\*a</sup> Nanping Xu<sup>a</sup> and K. Li<sup>b</sup>

a State Key Laboratory of Materials-Oriented Chemical Engineering, Nanjing University of Technology, 5 Xinmofan Road, Nanjing, 210009, P.R. China

b Department of Chemical Engineering and Chemical Technology, Imperial College London, London SW7 2AZ, UK

\*Corresponding author. E-mail: wqjin@njut.edu.cn

Table S1. Typical MIEC membranes and their performance for partial oxidation of methane.

| Membrane materials                                                                                | Membrane configurations/<br>thickness (mm) | Temperature<br>(°C) | Oxygen flux<br>(mL·cm <sup>-2</sup> ·min <sup>-1</sup> ) | Operation<br>time (h) | Membrane<br>environments   | Catalysts                                              | Ref. |
|---------------------------------------------------------------------------------------------------|--------------------------------------------|---------------------|----------------------------------------------------------|-----------------------|----------------------------|--------------------------------------------------------|------|
| <i>Single Phase</i>                                                                               |                                            |                     |                                                          |                       |                            |                                                        |      |
| Ba <sub>0.5</sub> Sr <sub>0.5</sub> Co <sub>0.8</sub> Fe <sub>0.2</sub> O <sub>3-δ</sub>          | disk/1.5                                   | 875                 | 11.5                                                     | 500                   | Air/50%CH <sub>4</sub> +He | LiLaNiO <sub>x</sub> /γ-Al <sub>2</sub> O <sub>3</sub> | 1,2  |
| Ba <sub>0.5</sub> Sr <sub>0.5</sub> Co <sub>0.8</sub> Fe <sub>0.2</sub> O <sub>3-δ</sub>          | tubular/-                                  | 875                 | 8.0                                                      | 500                   | Air/CH <sub>4</sub>        | LiLaNiO <sub>x</sub> /γ-Al <sub>2</sub> O <sub>3</sub> | 3    |
| Ba <sub>0.5</sub> Sr <sub>0.5</sub> Zn <sub>0.2</sub> Fe <sub>0.8</sub> O <sub>3-δ</sub>          | disk/1.25                                  | 900                 | 2.55                                                     | 65                    | Air/50%CH <sub>4</sub>     | Ni based                                               | 4    |
| BaCo <sub>0.4</sub> Fe <sub>0.4</sub> Zr <sub>0.2</sub> O <sub>3-δ</sub>                          | disk/1.0                                   | 850                 | 5.4~5.8                                                  | 2200                  | Air/50%CH <sub>4</sub> +He | LiLaNiO <sub>x</sub> /γ-Al <sub>2</sub> O <sub>3</sub> | 5    |
| BaCo <sub>0.4</sub> Fe <sub>0.5</sub> Ta <sub>0.1</sub> O <sub>3-δ</sub>                          | disk/0.7                                   | 900                 | 16~17                                                    | 400                   | Air/CH <sub>4</sub> +He    | Ni based                                               | 6,7  |
| BaCo <sub>0.7</sub> Fe <sub>0.2</sub> Nb <sub>0.1</sub> O <sub>3-δ</sub>                          | disk/1.0                                   | 900                 | ~20                                                      | 700                   | Air/CH <sub>4</sub>        | Pt, Rh, Ru/MgAlO <sub>x</sub>                          | 8-10 |
| SrCo <sub>0.4</sub> Fe <sub>0.4</sub> Zr <sub>0.1</sub> O <sub>3-δ</sub>                          | disk/0.2                                   | 850                 | 6.2                                                      | >1000                 | Air/CH <sub>4</sub> +He    | Ni/Al <sub>2</sub> O <sub>3</sub>                      | 11   |
| Sr <sub>1.7</sub> La <sub>0.3</sub> GaFeO <sub>5+δ</sub>                                          | disk/1.7                                   | 900                 | 1~1.3                                                    | >1000                 | Air/CH <sub>4</sub>        | Ni based                                               | 12   |
| La <sub>0.5</sub> Sr <sub>0.5</sub> Ga <sub>0.2</sub> Fe <sub>0.8</sub> O <sub>3-δ</sub>          | tubular/0.15                               | 850                 | 0.336                                                    | 696                   | Air/CH <sub>4</sub>        | Rh/Al <sub>2</sub> O <sub>3</sub>                      | 13   |
| Sr <sub>1.7</sub> La <sub>0.3</sub> Al <sub>0.6</sub> Fe <sub>1.4</sub> O <sub>5+δ</sub>          | tubular/0.8~1.0                            | 900                 | 4.2                                                      | 3400                  | Air/CH <sub>4</sub> +He    | Ni/Al <sub>2</sub> O <sub>3</sub>                      | 14   |
| A <sub>x</sub> A' <sub>1-x</sub> B <sub>y</sub> B' <sub>1-y</sub> O <sub>5+δ</sub>                | tubular/-                                  | 900                 | 10~12                                                    | >8760                 | Air/CH <sub>4</sub>        | Metal/ MIEC oxide                                      | 15   |
| BaCe <sub>0.15</sub> Fe <sub>0.85</sub> O <sub>3-δ</sub>                                          | disk/1.5                                   | 850                 | 3.0                                                      | 160                   | Air/CH <sub>4</sub> +He    | LiLaNiO <sub>x</sub> /γ-Al <sub>2</sub> O <sub>3</sub> | 16   |
| BaCe <sub>0.1</sub> Co <sub>0.4</sub> Fe <sub>0.5</sub> O <sub>3-δ</sub>                          | disk/1.0                                   | 875                 | 8.9                                                      | >1000                 | Air/CH <sub>4</sub>        | LiLaNiO <sub>x</sub> /γ-Al <sub>2</sub> O <sub>3</sub> | 17   |
| La <sub>0.5</sub> Sr <sub>0.5</sub> FeO <sub>3-δ</sub>                                            | tubular/1.0                                | 850                 | ~3.0                                                     | 7500                  | Air/CH <sub>4</sub>        | Ni based                                               | 18   |
| <i>Multiple Phase</i>                                                                             |                                            |                     |                                                          |                       |                            |                                                        |      |
| 9 wt.% YSZ-<br>SrCo <sub>0.4</sub> Fe <sub>0.6</sub> O <sub>3-δ</sub>                             | disk/1.8                                   | 850                 | 4.5                                                      | 220                   | Air/CH <sub>4</sub> +He    | Ni/Al <sub>2</sub> O <sub>3</sub>                      | 19   |
| 3wt.%Al <sub>2</sub> O <sub>3</sub> -<br>SrCo <sub>0.8</sub> Fe <sub>0.2</sub> O <sub>3-δ</sub>   | disk/1.3                                   | 850                 | ~2.3                                                     | >500                  | Air/CH <sub>4</sub> +He    | Ni/Al <sub>2</sub> O <sub>3</sub>                      | 20   |
| 5wt.%SrAl <sub>2</sub> O <sub>4</sub> -<br>SrCo <sub>0.8</sub> Fe <sub>0.2</sub> O <sub>3-δ</sub> | disk/1.0                                   | 850                 | 8.0                                                      | 1200                  | Air/CH <sub>4</sub> +He    | Ni/Al <sub>2</sub> O <sub>3</sub>                      | 21   |

| Membrane materials                                                                       | Membrane configurations/<br>thickness (mm) | Temperature<br>(°C) | Oxygen flux<br>(mL·cm <sup>-2</sup> ·min <sup>-1</sup> ) | Operation<br>time (h) | Membrane<br>environments                 | Catalysts                                              | Ref. |
|------------------------------------------------------------------------------------------|--------------------------------------------|---------------------|----------------------------------------------------------|-----------------------|------------------------------------------|--------------------------------------------------------|------|
| (SrFe) <sub>0.7</sub> (SrAl <sub>2</sub> ) <sub>0.3</sub> O <sub>z</sub>                 | disk/0.9                                   | 850                 | -                                                        | ~200                  | Air/50%CH <sub>4</sub> +He               | Pt/Al <sub>2</sub> O <sub>3</sub>                      | 22   |
| (SrFe) <sub>0.7</sub> (SrAl <sub>2</sub> ) <sub>0.3</sub> O <sub>z</sub>                 | tubular/1.25                               | 850-900             | -                                                        | 280                   | Air/CH <sub>4</sub> +CO <sub>2</sub> +He | Pt/LaNiO <sub>x</sub> /Al <sub>2</sub> O <sub>3</sub>  | 23   |
| <i>Dual-phase Membrane</i>                                                               |                                            |                     |                                                          |                       |                                          |                                                        |      |
| Ce <sub>0.8</sub> Gd <sub>0.2</sub> O <sub>2-δ</sub>                                     | disk/0.5                                   | 950                 | 2~5                                                      | 450                   | Air/CH <sub>4</sub>                      | LiLaNiO <sub>x</sub> /γ-Al <sub>2</sub> O <sub>3</sub> | 24   |
| Ga <sub>0.7</sub> Sr <sub>0.3</sub> FeO <sub>3-δ</sub>                                   |                                            |                     |                                                          |                       |                                          |                                                        |      |
| Ce <sub>0.85</sub> Sm <sub>0.15</sub> O <sub>2-δ</sub>                                   | disk/0.6                                   | 950                 | ~4                                                       | 630                   | Air/CH <sub>4</sub>                      | LiLaNiO <sub>x</sub> /γ-Al <sub>2</sub> O <sub>3</sub> | 25   |
| Sm <sub>0.6</sub> Sr <sub>0.4</sub> FeO <sub>3-δ</sub>                                   |                                            |                     |                                                          |                       |                                          |                                                        |      |
| Ce <sub>0.85</sub> Sm <sub>0.15</sub> O <sub>2-δ</sub>                                   | disk/0.5                                   | 950                 | 4.3                                                      | 1100                  | Air/CH <sub>4</sub>                      | LiLaNiO <sub>x</sub> /γ-Al <sub>2</sub> O <sub>3</sub> | 26   |
| Sm <sub>0.6</sub> Sr <sub>0.4</sub> Fe <sub>0.7</sub> Al <sub>0.3</sub> O <sub>3-δ</sub> |                                            |                     |                                                          |                       |                                          |                                                        |      |

## References

- 1 Z. P. Shao, G. X. Xiong, H. Dong, W. S. Yang, L. W. Lin, *Sep. Purif. Technol.*, 2001, **25**, 97.
- 2 Z. P. Shao, H. Dong, G. X. Xiong, Y. Cong, W. S. Yang, *J. Membr. Sci.*, 2001, **183**, 181.
- 3 H. H. Wang, Y. Cong, W. S. Yang, *Catal. Today*, 2003, **82**, 157.
- 4 H. H. Wang, C. Tablet, A. Feldhoff, J. Caro, *Adv. Mater.*, 2005, **17**, 1785.
- 5 J. H. Tong, W. S. Yang, R. Cai, B. C. Zhu, L. W. Lin, *Catal. Lett.*, 2002, 78, 129.
- 6 H. X. Luo, Y. Y. Wei, H. Q. Jiang, W. H. Yuan, Y. X. Lv, J. Caro, H. H. Wang, *J. Membr. Sci.*, 2010, **350**, 154.
- 7 H. X. Luo, B. B. Tian, Y. Y. Wei, H. H. Wang, H. Q. Jiang, J. Caro, *AIChE J.*, 2010, **56**, 604.
- 8 M. Harada, K. Domen, M. Hara, T. Tatsumi, *Chem. Lett.*, 2006, **35**, 968.
- 9 M. Harada, K. Domen, M. Hara, T. Tatsumi, *Chem. Lett.*, 2006, **35**, 1326.
- 10 M. Harada, *10th International Conference on Inorganic Membranes*, plenary lecture, Tokyo, Japan, 2008.
- 11 X. F. Chang, C. Zhang, Y. J. He, X. L. Dong, W. Q. Jin, N. P. Xu, *Chin. J. Chem. Eng.*, 2009, **17**, 562.
- 12 M. Schwartz, J. H. White, A. F. Sammells, US Patent 6033632, 2000.
- 13 J. T. Ritchie, J. T. Richardson, D. Luss, *AIChE J.*, 2001, **47**, 2092.
- 14 R. A. Mackay, A. F. Sammells, US Patent 6146549, 2000.
- 15 A. F. Sammells, M. Schwartz, R. A. Mackay, T. F. Barton, D. R. Peterson, *Catal. Today*, 2000, **56**, 325.
- 16 X. F. Zhu, H. H. Wang, Y. Cong, W. S. Yang, *Catal. Lett.*, 2006, **111**, 179.
- 17 Q. M. Li, X. F. Zhu, Y. F. He, W. S. Yang, *Catal. Today*, 2010, **149**, 185.
- 18 A. A. Markov, M. V. Patrakeev, I. A. Leonidov, V. L. Kozhevnikov, *J. Solid State Electrochem.*, 2011, **15**, 253.
- 19 X. H. Gu, W. Q. Jin, C. L. Chen, N. P. Xu, J. Shi, Y. H. Ma, *AIChE J.*, 2002, **48**, 2051.
- 20 Z. T. Wu, W. Q. Jin, N. P. Xu, *J. Membr. Sci.*, 2006, **279**, 320.
- 21 X. L. Dong, Z. K. Liu, Y. J. He, W. Q. Jin, N. P. Xu, *J. Membr. Sci.*, 2009, **331**, 109.
- 22 A. A. Yaremchenko, V. V. Kharton, A. A. Valente, S. A. Veniaminov, V. D. Belyaev, V. A. Sobyenin, F. M. B. Marques, *Phys. Chem. Chem. Phys.*, 2007, **9**, 2744.
- 23 A. A. Yaremchenko, V. V. Kharton, A. A. Valente, F. M. M. Snijkers, J. F. C. Coymans, J. J. Luyten, F. M. B. Marques, *J. Membr. Sci.*, 2008, **319**, 141.
- 24 X. F. Zhu, W. S. Yang, *AIChE J.*, 2008, **54**, 665.
- 25 X. F. Zhu, Q. M. Li, Y. F. He, Y. Cong, W. S. Yang, *J. Membr. Sci.*, 2010, **360**, 454.
- 26 X. F. Zhu, Q. M. Li, Y. Cong, W. S. Yang, *Catal. Commun.*, 2008, **10**, 309.
